# Supplementary material
Source: PubMed Central journal article supplement (PMC4511962)
Supplement: NIHMS707883-supplement-Supporting_Info.pdf [file NIHMS707883-supplement-Supporting_Info.pdf]

## Supporting Information

|                                                                                                                                                  |    |
|--------------------------------------------------------------------------------------------------------------------------------------------------|----|
| Figure S1. Viability of HT-1080 cells after aggregation assay.....                                                                               | S2 |
| Figure S2. Western blot depicting relative amounts of native galectin-3 across cell lines.....                                                   | S2 |
| Figure S3. Effect of lactose-functionalized dendrimers on untreated and galectin-3 induced homotypic aggregates of DU-145 and HT-1080 cells..... | S3 |
| Figure S4. Effect of lactose-functionalized dendrimers <b>1</b> and <b>4</b> on fixed A549 cells.....                                            | S4 |
| Figure S5. Selected primary data from the controls in cellular aggregation assays on A549 cells.....                                             | S5 |
| Figure S6. Selected primary data from cellular aggregation assays of A549 cells in which no additional galectin-3 was added.....                 | S6 |
| Figure S7. Selected primary data from cellular aggregation assays of A549 cells in the presence of additional galectin-3.....                    | S7 |

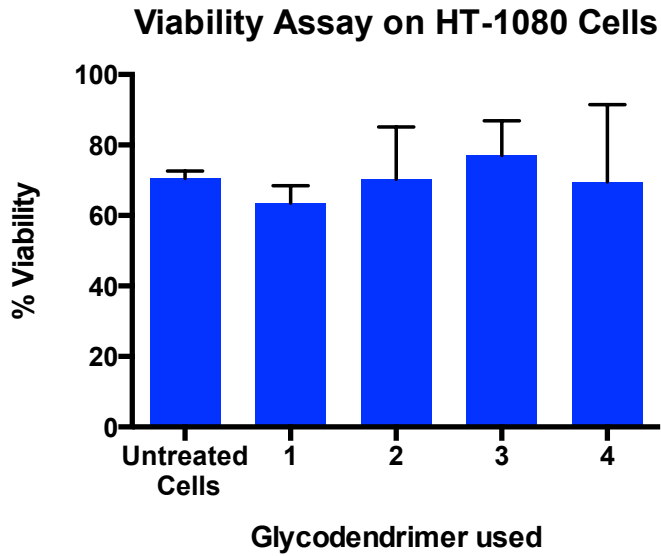

**Figure S1.** Viability of HT-1080 cells after aggregation assay. Dead cells were stained with Trypan Blue and the live/dead ratio was determined using a hemacytometer under 10x magnification.

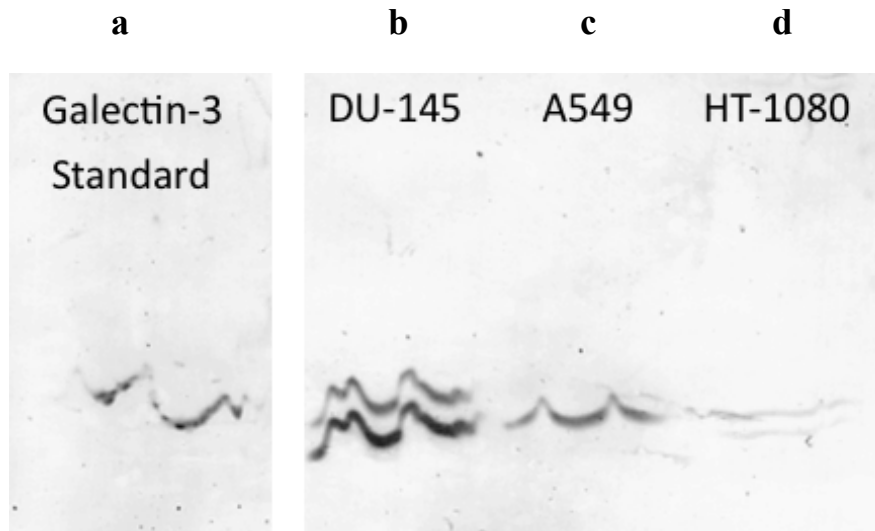

**Figure S2.** Western blot depicting relative amounts of native galectin-3 across cell lines. The experiment was performed as described in the methods section, and the nitrocellulose membrane was then scanned and analyzed. Lane **a**: 10  $\mu$ g galectin-3 standard. Lane **b**: 16  $\mu$ g DU-145 whole cell lysate. Lane **c**: 16  $\mu$ g A549 whole cell lysate. Lane **d**: 16  $\mu$ g HT-1080 whole cell lysate.

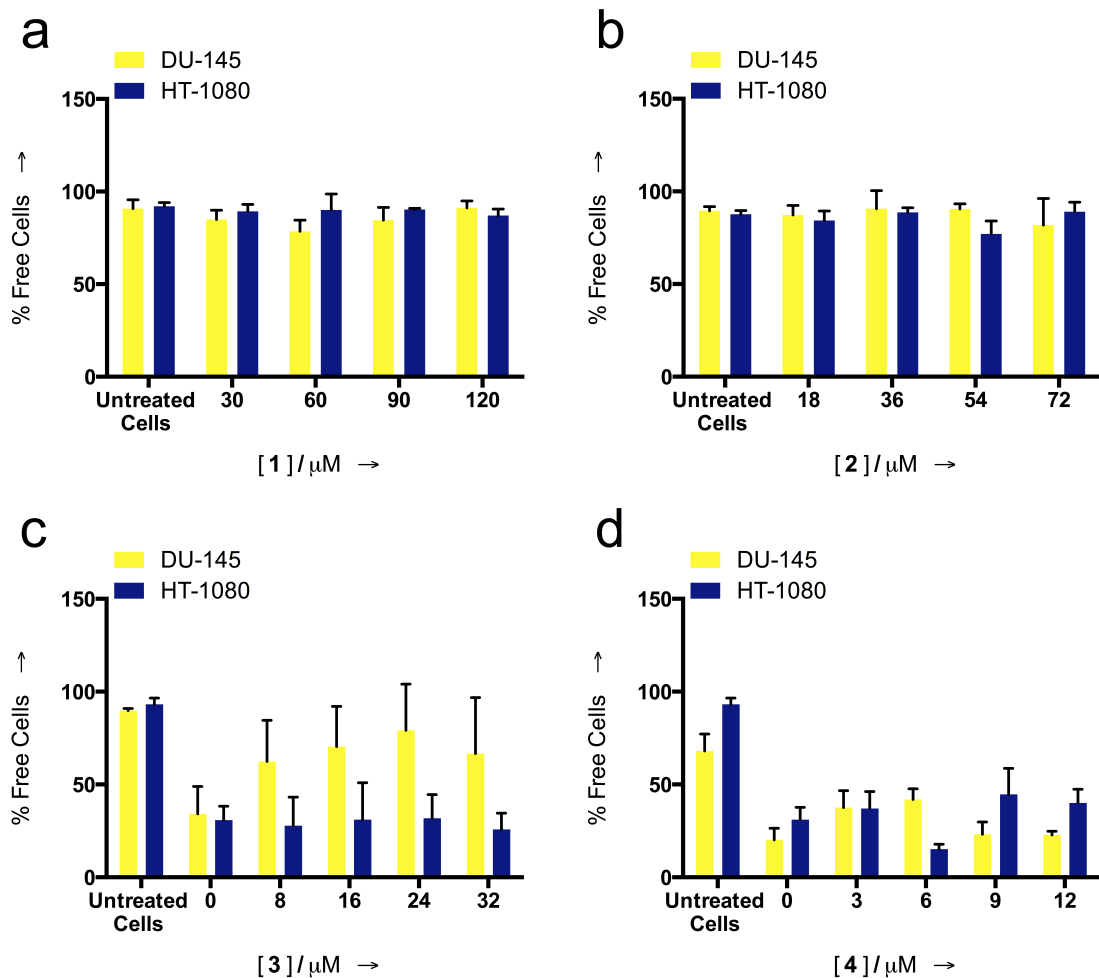

**Figure S3.** Effect of lactose-functionalized dendrimers on untreated and galectin-3 induced homotypic aggregates of DU-145 and HT-1080 cells. **(a)** Without the addition of galectin-3, no statistically significant results are observed in the presence of **1**. **(b)** Without the addition of galectin-3, no statistically significant results are observed in the presence of **2**. **(c)** Dendrimer **3** has no statistically significant effect on either cell line when galectin-3 has been added. **(d)** Dendrimer **4** has no statistically significant effect on galectin-3 treated cells.

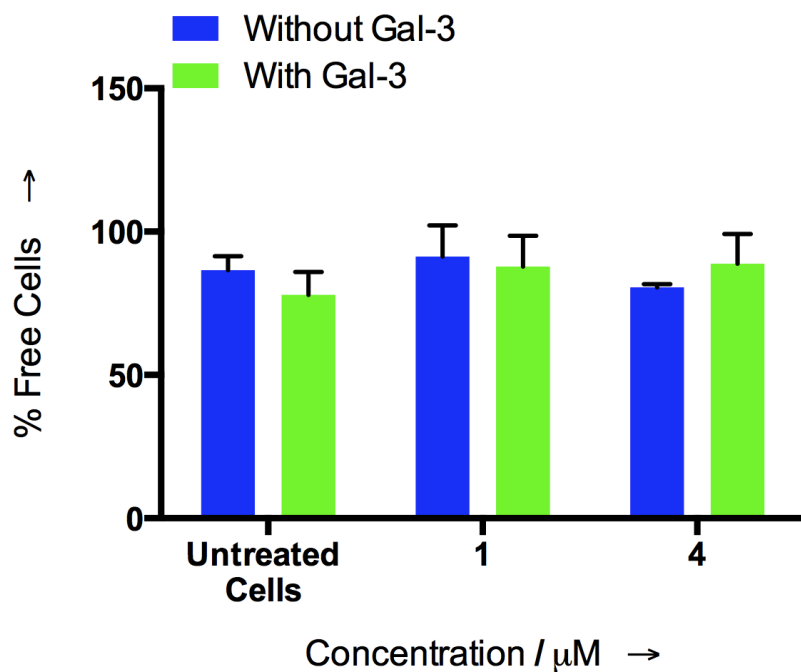

**Figure S4.** Effect of lactose-functionalized dendrimers **1** and **4** on fixed cells with and without added galectin-3. Dendrimer **1** was used at a concentration of 120  $\mu\text{M}$ , and **4** was used at a concentration of 12  $\mu\text{M}$ . As expected, there is no statistically significant difference between galectin-3 fixed cells and fixed cells to which galectin-3 has not been added, regardless of whether dendrimer has been added or not.

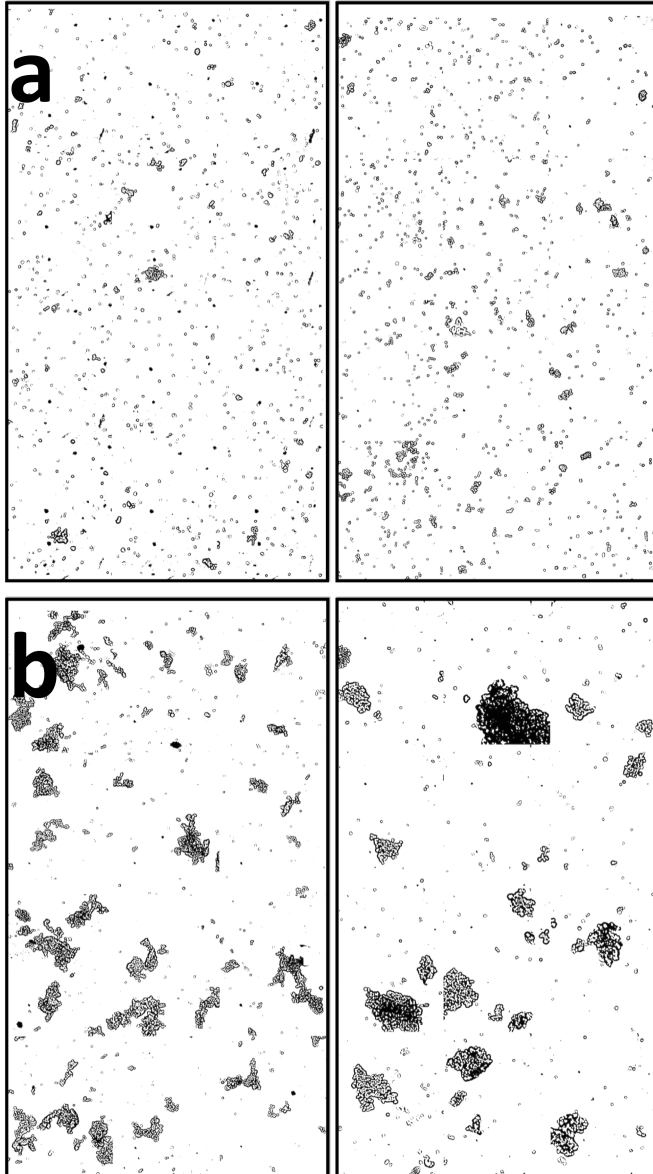

**Figure S5.** Selected primary data from the controls in cellular aggregation assays on A549 cells. Row (a) shows representative images from untreated cell experimentals. Images shown are compressed stills taken at 10x magnification then manipulated to black and white. Row (b) shows representative images from galectin-3 control experimentals.

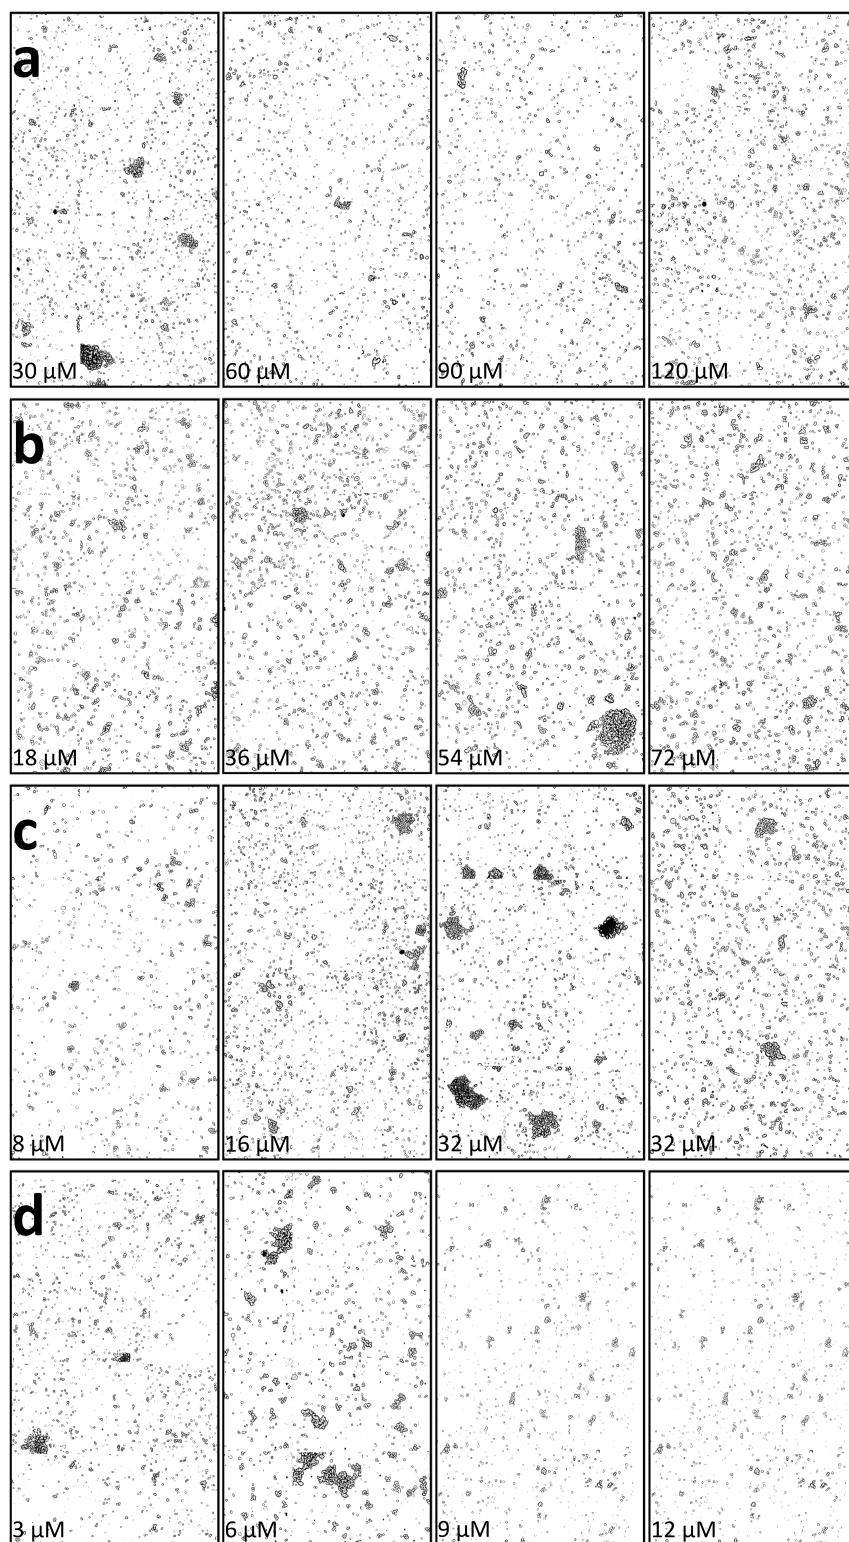

**Figure S6.** Selected primary data from cellular aggregation assays of A549 cells in which no additional galectin-3 was added. Images shown are compressed stills taken at 10x magnification then manipulated to black and white. Concentrations listed are for added dendrimers. Row (a) shows representative images for dendrimer 1. Row (b) shows representative images for dendrimer 2. Row (c) shows representative images for dendrimer 3. Row (d) shows representative images for dendrimer 4.

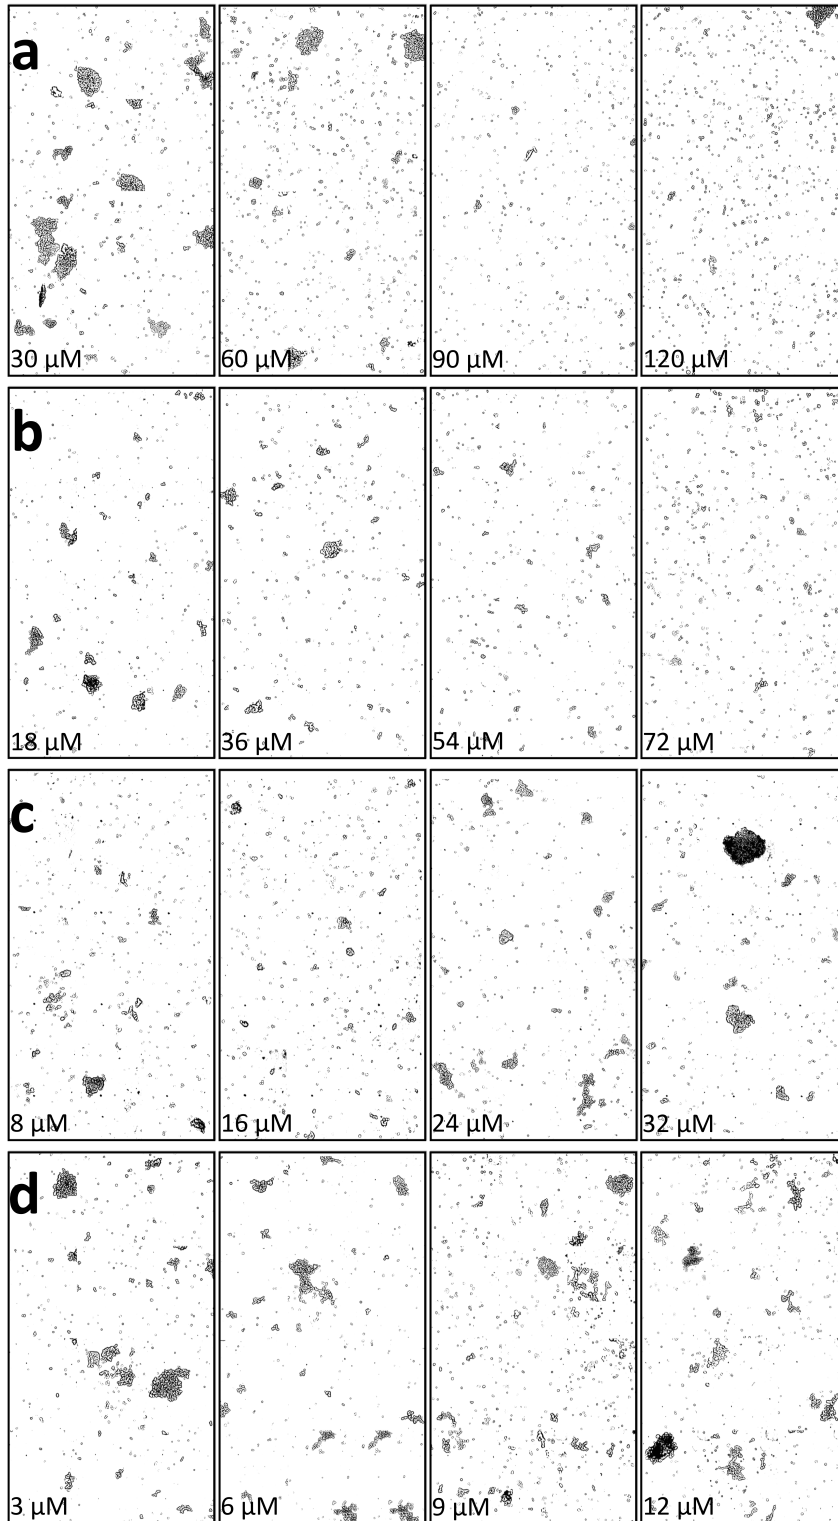

**Figure S7.** Selected primary data from cellular aggregation assays of A549 cells in the presence of additional galectin-3. Images shown are compressed stills taken at 10x magnification then manipulated to black and white. Concentrations listed are for added dendrimers. Row (a) shows representative images for dendrimer 1. Row (b) shows representative images for dendrimer 2. Row (c) shows representative images for dendrimer 3. Row (d) shows representative images for dendrimer 4.
